# Supplementary material for: Interacting Environmental Stress Factors Affect Metabolomics Profiles in Stored Naturally Contaminated Maize
Source: MDPI journal article supplement (doi:10.3390/microorganisms10050853), 2022-04-20
Supplement: s1 [file s1]

Suppl. Table S1. Statistical analyses of the effect of interacting abiotic factors on total secondary metabolites of the three genera found in the maize and the significance of those metabolites produced at &gt; 500 ng/g.

|                                                   |                | Wilcoxon/Kruskal-Wallis Tests (Rank Sums) |             |          |             | Non-parametric Comparisons for each pair using Wilcoxon Method |         |             |          |             |
|---------------------------------------------------|----------------|-------------------------------------------|-------------|----------|-------------|----------------------------------------------------------------|---------|-------------|----------|-------------|
|                                                   |                | Total                                     | Aspergillus | Fusarium | Penicillium | Level-Level                                                    | Total   | Aspergillus | Fusarium | Penicillium |
| Total Number of Secondary Metabolites             | Water activity | 0.0001*                                   | <.0001*     | 0.4892   | 0.0006*     | 0.95-0.90                                                      | 0.0245* | <.0001*     | 0.1541   | 0.0174*     |
|                                                   |                |                                           |             |          |             | 0.95-0.85                                                      | 0.0002* | <.0001*     | 0.8044   | 0.0066*     |
|                                                   |                |                                           |             |          |             | 0.95-0.80                                                      | 0.0001* | 0.0003*     | 0.6206   | 0.0174*     |
|                                                   |                |                                           |             |          |             | 0.90-0.85                                                      | 0.0005* | 0.0021*     | 0.2688   | 0.0049*     |
|                                                   |                |                                           |             |          |             | 0.90-0.80                                                      | 0.0012* | 0.0056*     | 0.3361   | 0.0060*     |
|                                                   |                |                                           |             |          |             | 0.85-0.80                                                      | 0.6847  | 0.7447      | 0.8837   | 0.9768      |
|                                                   | Temperature    | 0.1527                                    | 0.6884      | 0.0050*  | 0.0002*     | 35-30                                                          | 0.1393  | 0.2550      | 0.7100   | <.0001*     |
|                                                   |                |                                           |             |          |             | 35-25                                                          | 0.0493* | 0.5166      | 0.0252*  | <.0001*     |
|                                                   |                |                                           |             |          |             | 35-20                                                          | 0.1403  | 0.6381      | 0.0593   | 0.0030*     |
|                                                   |                |                                           |             |          |             | 30-25                                                          | 0.3239  | 0.6834      | 0.0019*  | 0.4222      |
|                                                   |                |                                           |             |          |             | 30-20                                                          | 0.9754  | 0.9220      | 0.0075*  | 0.7570      |
|                                                   |                |                                           |             |          |             | 25-20                                                          | 0.3697  | 0.4599      | 0.7488   | 0.3396      |
| Total Number of Secondary Metabolites (> 500ng/g) | Water activity | <.0001*                                   | <.0001*     | 0.0027*  | <.0001*     | 0.95-0.90                                                      | <.0001* | <.0001*     | 0.0335*  | 0.0010*     |
|                                                   |                |                                           |             |          |             | 0.95-0.85                                                      | <.0001* | <.0001*     | 0.0247*  | 0.0004*     |
|                                                   |                |                                           |             |          |             | 0.95-0.80                                                      | <.0001* | <.0001*     | 0.0003*  | 0.0004*     |
|                                                   |                |                                           |             |          |             | 0.90-0.85                                                      | 0.0054  | 0.0707      | 0.8353   | 0.0308*     |
|                                                   |                |                                           |             |          |             | 0.90-0.80                                                      | <.0001* | 0.5286      | 0.1605   | 0.0172*     |
|                                                   |                |                                           |             |          |             | 0.85-0.80                                                      | 0.0151* | 0.2850      | 0.0863   | 0.3861      |
|                                                   | Temperature    | 0.7494                                    | 0.4700      | 0.5504   | 0.0295*     | 35-30                                                          | 0.4961  | 0.7788      | 0.3584   | 0.0057*     |
|                                                   |                |                                           |             |          |             | 35-25                                                          | 0.2709  | 0.5754      | 0.9766   | 0.0089*     |
|                                                   |                |                                           |             |          |             | 35-20                                                          | 0.8865  | 0.3450      | 0.3163   | 0.1341      |
|                                                   |                |                                           |             |          |             | 30-25                                                          | 0.8768  | 0.2829      | 0.3920   | 0.7003      |
|                                                   |                |                                           |             |          |             | 30-20                                                          | 0.6647  | 0.1604      | 0.7015   | 0.5518      |
|                                                   |                |                                           |             |          |             | 25-20                                                          | 0.6008  | 0.6137      | 0.2753   | 0.4208      |

\*Indicates significant differences. Different colours indicate the level of significance. Red p-values<0.05, orange p-values<0.001 and black >0.05.
